# Supplementary material
Source: HighWire-hosted journal article supplement (http://molpharm.aspetjournals.org/highwire/filestream/77202/field_highwire_adjunct_files/1/SupportingMatFells87080.pdf)
Supplement: SupportingMatFells87080.pdf [file SupportingMatFells87080.pdf]

## Supplemental Data

### Molecular Pharmacology

#### Hits of a High-Throughput Screen Identify the Hydrophobic Pocket of Autotaxin/Lysophospholipase D as an Inhibitory Surface

James I. Fells, Sue Chin Lee, Yuko Fujiwara, Derek D. Norman, Keng Gat Lim, Ryoko Tsukahara, Jianxiong Liu, Renukadevi Patil, Duane D. Miller, R. Jason Kirby, Sandra Nelson, William Seibel, Ruben Papoian, Abby L. Parrill, Daniel L. Baker, Robert Bittman and Gabor Tigyi

Dept. of Physiology, University of Tennessee Health Science Center, Memphis, TN(JF, SCL, YF, DN, KGL, RT, JL)

Dept. of Pharmaceutical Sciences, University of Tennessee Health Science Center, Memphis, TN (RP, DM)

Drug Discovery Center, University of Cincinnati, Cincinnati, OH,(RK, SN, WS, RP)

Computational Research on Materials Institute, Department of Chemistry, University of Memphis, Memphis, TN(AP, DB)

Department of Chemistry and Biochemistry, Queens College of The City University of New York, Flushing, New York (RB)

#### Supplemental Figure Legend

Supplemental Figure 1. Characterization of the ATX HTS assay:

Supplemental Figure 2. Activity of ATX mutants. Activity of ATX was assessed by FS-3 assays. Triplicate wells were loaded with 100  $\mu$ l of reaction cocktail in ATX assay buffer (50 mM Tris, 140 mM NaCl, 5 mM KCl, 1 mM CaCl<sub>2</sub>, 1 mM MgCl<sub>2</sub>, pH 8.0 ), resulting in overall concentrations of 10 mM BSA, 1 mM FS-3, and 0 or 0.5X per well. Ten-fold dilutions of concentrated culture medium from HEK293T transfected with the mutants were added. Fluorescence intensity of FS-3 conversion was read initially and after 4 hour incubation at 37°C at Ex/Em 485/538 nm. Data are the mean value of the triplicates for each sample and reported as average % activity of ATX compared to the WT ATX sample

Supplemental Figure 3. FS-3 LPC-analog docked into the ATX structure using the MOE software. Note that the hydrocarbon chain analogous to that of LPC occupies the hydrophobic pocket whereas, the fluorochrome is in a space that is distinct from the hydrophobic pocket and distal to the hydrophobic tunnel. This set of interactions makes the FS-3 substrate ideal for identification of both active-site and hydrophobic pocket interacting inhibitors.

## Supplemental Figure 1

2 nM ATX incubated for 3 hr appears sufficient for compound screening with S/B > 60, Z' > 0.6, and LPA inhibition near 100%.

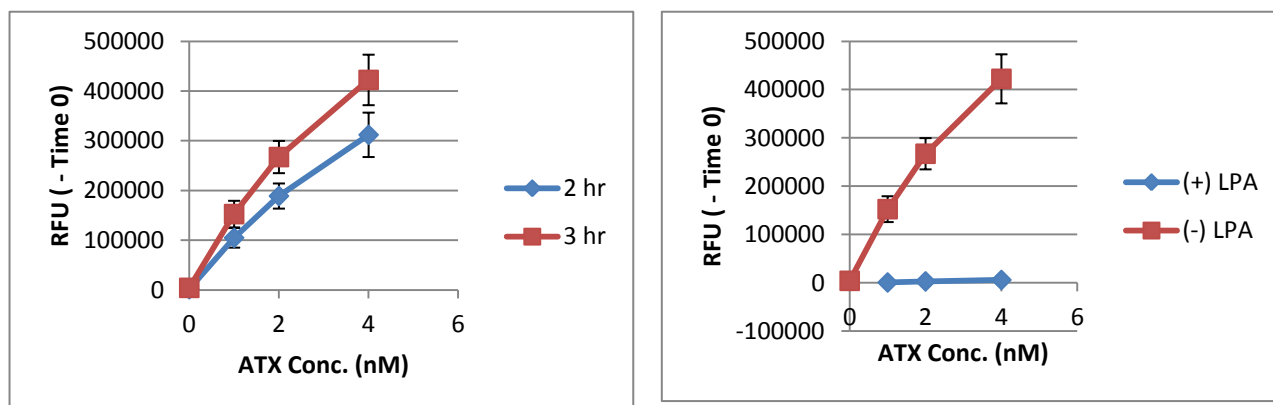

**Analysis:** Fluorescence data were normalized to the median of neutral controls (2 nM ATX) and inhibitor controls (0 ATX) as follows:

| Control                   | % Activity                  |                                               |
|---------------------------|-----------------------------|-----------------------------------------------|
| 2 nM ATX                  | 0 %                         | Equivalent to no effect of test compound      |
| 0 ATX                     | -100%                       | Equivalent to maximum effect of test compound |
| 2 nM ATX + 10 $\mu$ M LPA | Mean from screen<br>-84.72% | (+) control provides strong inhibition        |

**Results:** The assay produced robust results with signal / background (S/B) ratios ranging from 3.14 – 4.70. Results were calculated based on the difference between (-) ATX and (+) ATX at 3 hr. LPA worked very well to inhibit ATX (~ 85%). These plates were repeated a second time with some improvement, but wells that did not produce reliable results were removed from analysis.

| % Inhibition | # Compounds | Cumulative # Compounds |
|--------------|-------------|------------------------|
| 90 – 100%    | 5           | 5                      |
| 80 – 90%     | 19          | 24                     |
| 70 – 80%     | 24          | 48                     |
| 60 – 70%     | 56          | 104                    |
| 50 – 60%     | 94          | 198                    |
| 40 - 50%     | 143         | 341                    |
| 30 – 40%     | 284         | 625                    |
| < 30%        | 9027        | 9652                   |

Assay Performance:

|       | mean  | range         |
|-------|-------|---------------|
| S / B | 4.19  | 3.14 – 4.70   |
| Z'    | 0.847 | 0.554 – 0.924 |

Supplemental Figure 2.

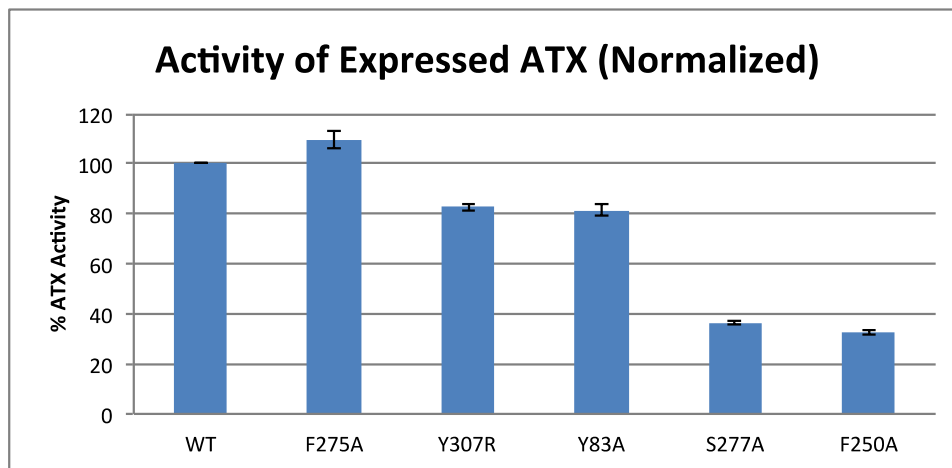

Supplemental Figure 3.

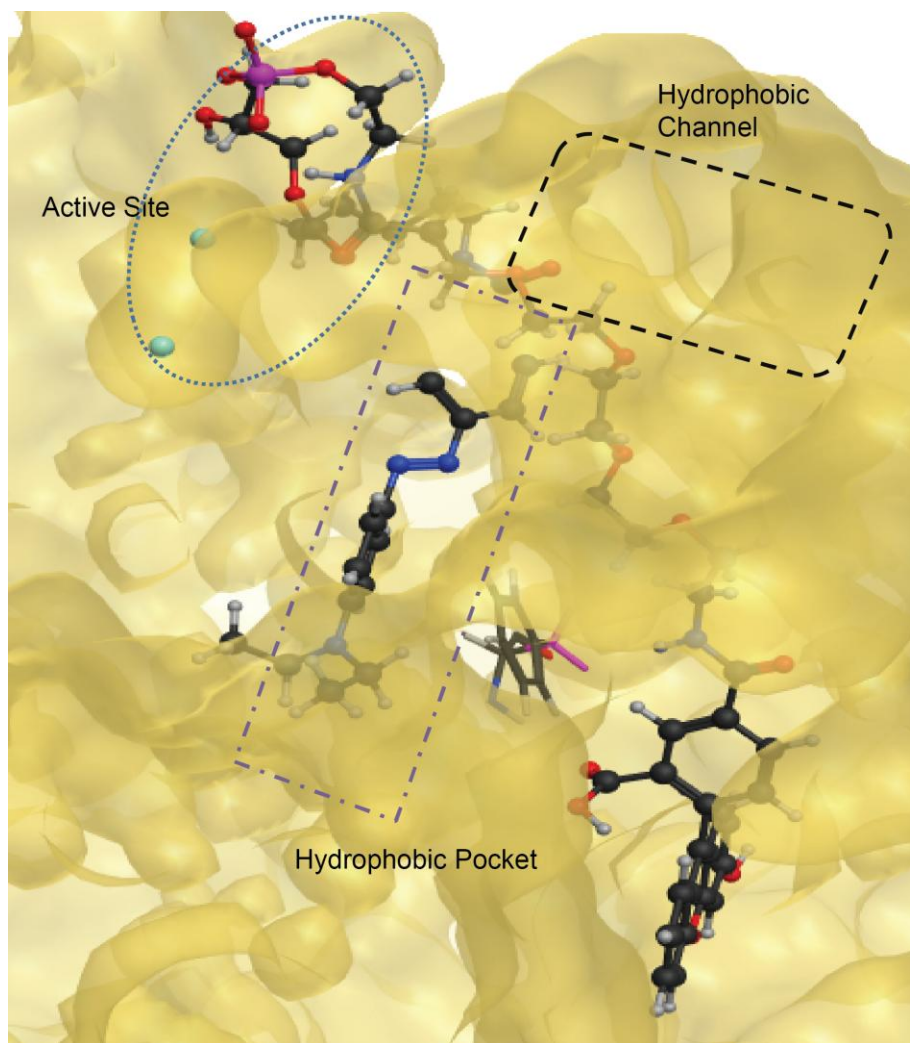

**Supplemental Table 1**

Inhibitors hits identified by high-throughput screening using FS-3 assay

The structures of the compounds are available from the UC DDC

(<http://www.drugdiscovery.uc.edu/>).

| DDC ID | % inhibition |
|--------|--------------|
| 966791 | 94.52        |
| 931126 | 93.27        |
| 918013 | 91.89        |
| 14087  | 90.43        |
| 934399 | 90.23        |
| 946634 | 88.62        |
| 501961 | 88.34        |
| 184018 | 88.11        |
| 766391 | 87.96        |
| 903815 | 87.57        |
| 146638 | 84.27        |
| 994525 | 84.01        |
| 182135 | 84.01        |
| 197620 | 83.04        |
| 182626 | 82.73        |
| 401402 | 82.52        |
| 405628 | 82.26        |
| 587712 | 82.24        |
| 947740 | 81.7         |
| 779181 | 81.37        |
| 923950 | 80.84        |
| 977773 | 80.42        |
| 169992 | 80.35        |
| 942504 | 80.2         |
| 926334 | 79.04        |
| 977533 | 78.31        |
| 929275 | 77.86        |
| 194255 | 77.53        |
| 763068 | 77.46        |
| 504717 | 77.44        |
| 501803 | 77.3         |
| 936332 | 76.26        |
| 129010 | 75.27        |
| 919233 | 74.93        |

| DDC ID | % inhibition |
|--------|--------------|
| 897131 | 74.4         |
| 800131 | 74.39        |
| 185520 | 74.33        |
| 963604 | 74.02        |
| 923091 | 73.83        |
| 390375 | 72.89        |
| 923745 | 72.78        |
| 944059 | 72.74        |
| 195845 | 72.61        |
| 773518 | 71.69        |
| 396852 | 71.6         |
| 155248 | 70.96        |
| 150748 | 70.64        |
| 934962 | 70           |
| 189581 | 69.93        |
| 928551 | 69.78        |
| 990364 | 69.06        |
| 793165 | 68.75        |
| 171842 | 68.33        |
| 911161 | 67.93        |
| 856398 | 67.87        |
| 185153 | 67.77        |
| 924414 | 67.7         |
| 236689 | 67.65        |
| 194992 | 67.63        |
| 503843 | 67.56        |
| 929372 | 67.04        |
| 492324 | 66.89        |
| 182507 | 66.63        |
| 897143 | 66.61        |
| 396446 | 66.45        |
| 714508 | 66.37        |
| 989814 | 65.98        |
| 501385 | 65.94        |

| DDC ID  | % inhibition |
|---------|--------------|
| 979420  | 65.81        |
| 411727  | 65.33        |
| 977136  | 64.28        |
| 383926  | 63.87        |
| 1007456 | 63.74        |
| 965199  | 63.69        |
| 1007714 | 63.3         |
| 98870   | 63.27        |
| 946284  | 63.23        |
| 949538  | 62.97        |
| 913315  | 62.68        |
| 726654  | 62.39        |
| 152382  | 62.32        |
| 1003272 | 62.31        |
| 379917  | 62.28        |
| 185505  | 62.24        |
| 966139  | 61.99        |
| 373724  | 61.73        |
| 94289   | 61.67        |
| 764694  | 61.61        |
| 774500  | 61.51        |
| 405726  | 61.37        |
| 386011  | 61.25        |
| 918217  | 61.1         |
| 966800  | 61.08        |
| 925321  | 60.85        |
| 249643  | 60.84        |
| 938976  | 60.7         |
| 118865  | 60.5         |
| 990571  | 60.4         |
| 194279  | 60.37        |
| 994461  | 60.3         |
| 924266  | 60.25        |
| 920540  | 60.1         |

| DDC ID | % inhibition |
|--------|--------------|
| 226845 | 60.03        |
| 13663  | 60.01        |
| 171358 | 59.96        |
| 923027 | 59.95        |
| 153053 | 59.39        |
| 502095 | 59.36        |
| 262052 | 59.33        |
| 253051 | 59.16        |
| 503583 | 59.04        |
| 937347 | 58.96        |
| 773563 | 58.79        |
| 930769 | 58.76        |
| 766346 | 58.55        |
| 194780 | 58.42        |
| 902881 | 58.37        |
| 945497 | 58.27        |
| 912368 | 58.18        |
| 947144 | 58.04        |
| 253862 | 57.97        |
| 935401 | 57.93        |
| 197127 | 57.7         |
| 149849 | 57.66        |
| 188616 | 57.22        |
| 291732 | 56.8         |
| 119479 | 56.79        |
| 916694 | 56.78        |
| 182831 | 56.72        |
| 521161 | 56.29        |
| 382296 | 56.28        |
| 181493 | 56.26        |
| 787625 | 55.95        |
| 946793 | 55.83        |
| 193595 | 55.78        |
| 702352 | 55.76        |
| 114199 | 55.57        |
| 966240 | 55.52        |
| 901656 | 55.37        |
| 543450 | 55.13        |
| 928933 | 55.12        |

| DDC ID  | % inhibition |
|---------|--------------|
| 503380  | 54.98        |
| 798171  | 54.75        |
| 928943  | 54.62        |
| 232620  | 54.48        |
| 518182  | 54.47        |
| 1009104 | 54.37        |
| 994194  | 54.36        |
| 519793  | 54.25        |
| 406557  | 54.14        |
| 1002382 | 54.09        |
| 128624  | 54.07        |
| 518033  | 53.93        |
| 787517  | 53.9         |
| 757999  | 53.89        |
| 989985  | 53.74        |
| 254179  | 53.57        |
| 967605  | 53.5         |
| 764910  | 53.5         |
| 953225  | 53.4         |
| 9896    | 53.38        |
| 263156  | 53.29        |
| 945159  | 53.19        |
| 963522  | 53.02        |
| 860716  | 52.95        |
| 892478  | 52.88        |
| 990463  | 52.82        |
| 291709  | 52.82        |
| 383544  | 52.6         |
| 391849  | 52.45        |
| 543599  | 52.41        |
| 194072  | 52.4         |
| 944610  | 52.33        |
| 251599  | 52.17        |
| 761498  | 52.03        |
| 123162  | 51.85        |
| 825594  | 51.81        |
| 511135  | 51.79        |
| 995092  | 51.63        |
| 934493  | 51.51        |

| DDC ID  | % inhibition |
|---------|--------------|
| 186010  | 51.45        |
| 389078  | 51.41        |
| 193649  | 51.28        |
| 966949  | 50.99        |
| 414096  | 50.98        |
| 994691  | 50.81        |
| 949724  | 50.8         |
| 954432  | 50.73        |
| 919079  | 50.49        |
| 952461  | 50.46        |
| 527595  | 50.46        |
| 929785  | 50.44        |
| 936588  | 50.34        |
| 977219  | 50.33        |
| 251643  | 50.33        |
| 1009281 | 50.31        |
| 934313  | 50.31        |
| 251606  | 50.2         |

**Supplemental Table 2.**Reported IC<sub>50</sub> values identified in the original high-throughput screen.

| DDC ID | IC50(nM) |
|--------|----------|
| 903815 | 4.29     |
| 931126 | 6.50     |
| 918013 | 31.42    |
| 966791 | 53.05    |
| 406643 | 54.32    |
| 897903 | 59.93    |
| 501961 | 61.47    |
| 182135 | 153.50   |
| 390596 | 170.40   |
| 503380 | 209.50   |
| 898736 | 233.20   |
| 923091 | 235.50   |
| 783342 | 241.00   |
| 408829 | 289.60   |
| 947740 | 380.80   |
| 946793 | 386.40   |
| 977773 | 421.90   |
| 781579 | 435.10   |
| 504717 | 500.50   |
| 918217 | 546.80   |
| 501803 | 646.60   |
| 918217 | 789.30   |
| 856398 | 816.00   |
| 527279 | 854.70   |
| 942504 | 888.90   |
| 937459 | 954.90   |
